# Supplementary material for: External Stimuli-Responsive Characteristics of Poly(N,N′-diethylacrylamide) Hydrogels: Effect of Double Network Structure
Source: MDPI journal article supplement (doi:10.3390/gels8090586), 2022-09-15
Supplement: s1 [file s1]

# **External Stimuli-Responsive Characteristics of Poly(*N,N'*-diethylacrylamide) Hydrogels: Effect of Double Network Structure**

**Julie Šťastná, Vladislav Ivaniuzhenkov and Lenka Hanyková \***

Department of Macromolecular Physics, Faculty of Mathematics and Physics, Charles University,  
V Holešovičkách 2, 180 00 Prague 8, Czech Republic

\* Correspondence: lenka.hanykova@mff.cuni.cz

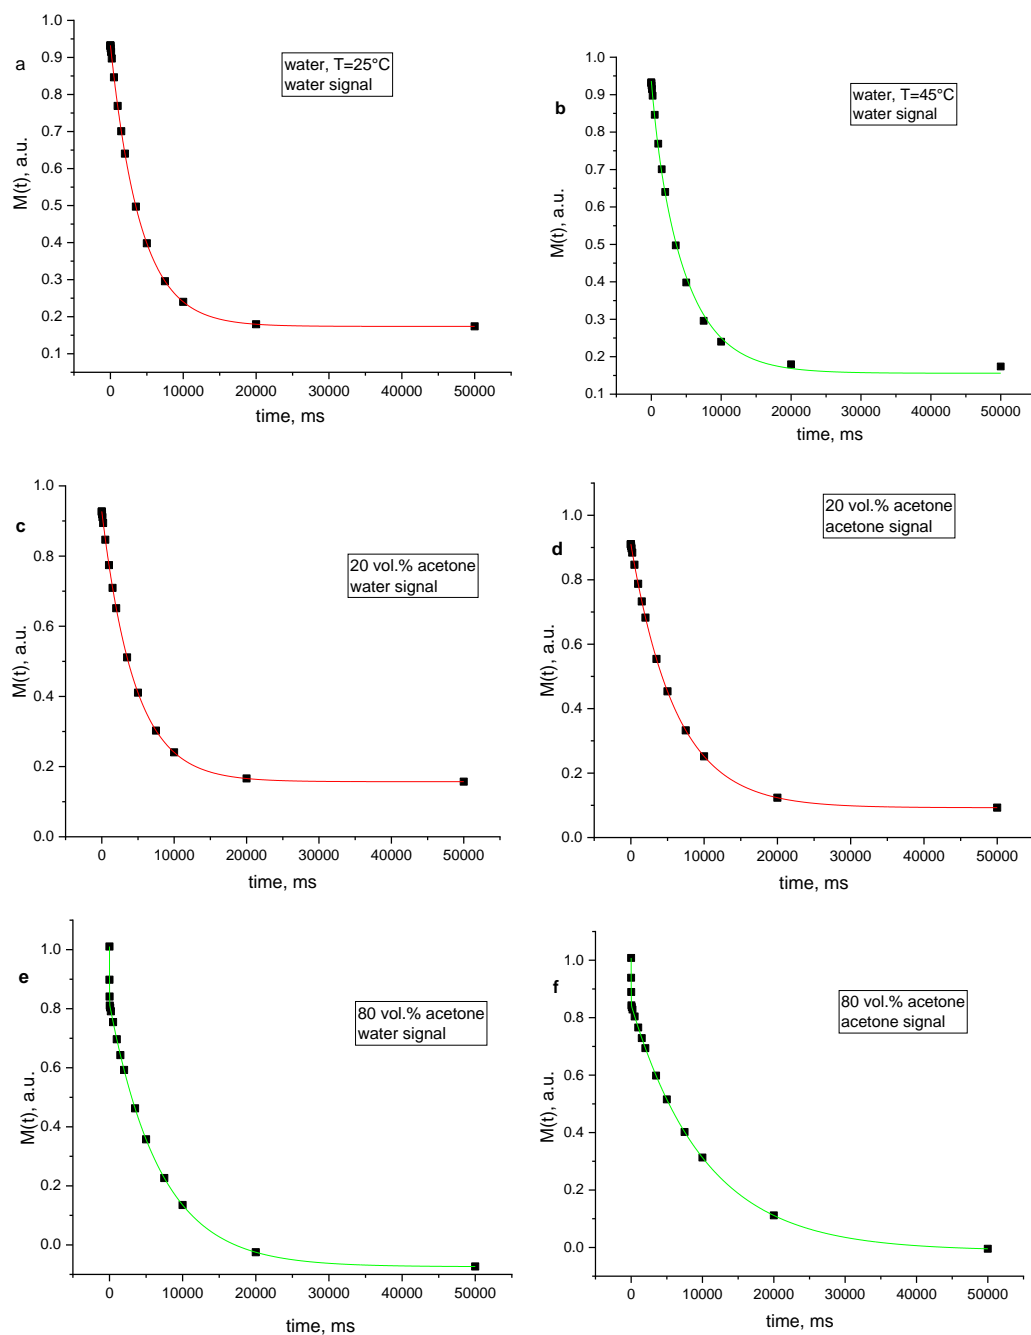

**Figure S1.** Proton  $T_2$  relaxation curves of solvent molecules in various solutions with DN-DA hydrogel: (a) water,  $T=25^\circ\text{C}$ , (b) water,  $T=45^\circ\text{C}$ , (c, d) 20 vol.% acetone, (e, f) 80 vol.% acetone. Red lines show single-exponential fit (Equation S1), green lines show bi-exponential fit (Equation S2).

$T_2$  relaxation curves with single-exponential decay were fitted with equation

$$M(t) = M_0 \exp\left(-\frac{T_2}{t}\right) + y_0 \quad (\text{S1})$$

where  $T_2$  is spin-spin relaxation time,  $M_0$  is pre-exponential factor and  $y_0$  is constant.

$T_2$  relaxation curves with bi-exponential decay were fitted with equation

$$M(t) = M_0^1 \exp\left(-\frac{T_2^1}{t}\right) + M_0^2 \exp\left(-\frac{T_2^2}{t}\right) + y_0 \quad (\text{S2})$$

where  $T_2^1$  and  $T_2^2$  are components of spin-spin relaxation time,  $M_0^1$  and  $M_0^2$  are pre-exponential factors and  $y_0$  is constant.
